# Supplementary material
Source: Research Square preprint supplement (doi:10.21203/rs.3.rs-8927804/v1)
Supplement: Supplementary file 1 [file dc14bd86335606ee7415e06a.docx]

**Heart Rate Variability Synchronization relates to Trust Decisions during an Economic Investment Game**

**Supplementary Information**

Stella Wienhold1,2, Nina Volkmer1,2, Bernadette F. Denk1,2, Raphaela J. Gaertner1, Elea S. C. Klink1, Maria Meier1,4, Wolfgang Gaissmaier2,3& Jens C. Pruessner1,2

*1Neuropsychology, Department of Psychology, University of Konstanz, Germany*

*2Centre for the Advanced Study of Collective Behavior, Konstanz, Germany*

*3Social Psychology and Decision Sciences, Department of Psychology, University of Konstanz, Germany*

*4Department of Child and Adolescent Psychiatry/Psychotherapy, University of Ulm, Germany*

Corresponding author: Stella Wienhold ([stella.wienhold@uni-konstanz.de](mailto:stella.wienhold@uni-konstanz.de)), ORCID: 0009-0003-8275-4673

| **Table S1.** Demographic and sample characteristics | |
| --- | --- |
| **Variable** | **n (%) or M (SD)** |
| Participants, N | 100 |
| Dyads, N | 50 |
| Age, years | 23.3 (5.43) |
| BMI, kg/m² | 22.4 (3.04) |
| Female | 65 (65%) |
| Male | 35 (35%) |
| Dyad: female–female | 21 (42%) |
| Dyad: male–male | 6 (12%) |
| Dyad: mixed-gender | 23 (46%) |
| Dyads acquainted | 9 (18%) |
| Fellow students | 4 |
| Friends | 3 |
| Colleagues | 1 |
| Roommates | 1 |
| Alcohol use: never | 14 (14%) |
| < 1×/month | 18 (18%) |
| 2–4×/month | 49 (49%) |
| 2–3×/week | 17 (17%) |
| ≥ 4×/week | 2 (2%) |
| Standard drinks per drinking day | 2.55 (1.41) |
| Current smokers | 4 (4%) |
| Cigarettes/day among smokers | 2.5 (1.73) |
| Note. Values are presented as n (%) or M (SD). N = 100 participants; 50 dyads. | |

|  |
| --- |

| **Table S2.** Overview of questionnaires used. | |  | | | |
| --- | --- | --- | --- | --- | --- |
| **Construct measured** | **Time point** | | **Questionnaire** | **Reference** | |
| **HRV markers** | B1 | |  | |  |
| **affect** | B1, SB, B2 | | PANAS | | Breyer & Bluemke, 2016 |
| **stress** |  | |  | |  |
| perceived stress during last month | B1 | | PSS-10 | | Cohen et al., 1983 |
| stress & coping behavior | B1 | | SCI | | Satow, 2024 |
| **social dispositions** |  | |  | |  |
| empathy | B1 | | SPF | | Paulus, 2003 |
| social responsibility | B1 | | SSV | | Bierhoff, 2012 |
| perceived fairness | B1, SB | |  | |  |
| perceptions of justice | B2 | | BSJO | | Hülle et al., 2018 |
| fairness intention | B1, SB | |  | |  |
| **interpersonal and relational factors** |  | |  | |  |
| familiarity to each other | SB | |  | |  |
| perception of each other | SB | | METI | | Hendriks et al., 2017 |
| stress from interfamiliar relationships | SB | | BFB | | Böhm, 1999 |
| behaviour & experience in love relationships | SB | | BoBi | | Neumann et al., 2007 |
| perceived physiological synchronization | SB, B2 | |  | |  |
| **mental health and well-being** |  | |  | |  |
| psychological symptoms and distress | B2 | | BSI | | Spitzer et al., 2011 |
| subjective wellbeing during last 2 weeks | B2 | | WHO-5 | | Topp et al., 2015 |
| **early life adversity** |  | |  | |  |
| early life adversity | B2 | | KERF-40-I | | Thekkumthala et al., 2022 |
| childhood maltreatment | screening | | CTQ | | Wingenfeld et al., 2010 |
| parental bonding | screening | | PBI | | Parker et al., 1979 |
| **personality traits** | B1/ B2 | | BFI-45 | | Rammstedt & Danner, 2017 |

Note. B1 = Individual baseline 1; SB = shared phases; B2 = Individual baseline 2. HRV = heart rate variability. **Questionnaire abbreviations**: PANAS = Positive and Negative Affect Schedule; PSS-10 = 10-item Perceived Stress Scale; SCI = Stress and Coping Inventory; SPF = Saarbrücker Persönlichkeitsfragebogen; SSV = Skala sozialer Verantwortung; BSJO = Belief in a Just Social Order scale; METI = Measure of Empathic Tendency/Interpersonal perception; BFB = Fragebogen zu Beziehungs-/Familienbelastungen; BoBi = Bochumer Bindungsfragebogen; BSI = Brief Symptom Inventory; WHO-5 = WHO-5 Well-Being Index; KERF-40-I= Kurzfragebogen zur Erfassung belastender Kindheitserfahrungen (40-item version); CTQ = Childhood Trauma Questionnaire; PBI = Parental Bonding Instrument; BFI-45 = 45-item Big Five Inventory.

**Table S3.** Model comparison results for Hypothesis 1 (predicting UHF-HRV synchrony during the investment game).

| **Model Name** | **Model Equation** | **Model Description** | | **χ²** | **df** | | **p** | **AIC** | **BIC** |  |
| --- | --- | --- | --- | --- | --- | --- | --- | --- | --- | --- |
| M1_UHF | Fixed-intercept model | Model with fixed intercept only |  | | |  |  | 502.38 | 509.00 |  |
| M1RI_UHF | M1 + (1|ID_Dyad_P1P2) | Null model with random intercept for dyads |  | | |  |  | 422.89 | 432.83 |  |
| M1_age_upper_UHF | M1RI + age_upper | Adds older participant age | 0.35 | | | 1 | .557 | 424.55 | 437.80 |  |
| M1_age_lower__UHF | M1RI + age_lower | Adds younger participant age | 4.37 | | | 1 | .037 | 420.53 | 433.78 | * |
| M1_BMI_upper_UHF | M1RI + BMI_upper | Adds upper BMI | 0.01 | | | 1 | .933 | 424.89 | 438.14 |  |
| M1_BMI_lower_UHF | M1RI + BMI_lower | Adds lower BMI | 0.14 | | | 1 | .712 | 424.75 | 438.01 |  |
| M1_knowing_UHF | M1RI + knowing | Adds familiarity of participants | 0.05 | | | 1 | .809 | 424.83 | 438.09 |  |
| M1_sex_UHF | M1RI + WP_P2_ME_z + WP_P1_ME_z + dyad_sex | Adds dyad sex composition | 8.48 | | | 2 | .014 | 418.41 | 434.98 | * |
| M1_WP1_UHF | M1RI + WP_P1_ME_z | Adds trustor mean wavelet power (WP1) | 17.38 | | | 1 | < .001 | 403.03 | 422.91 | *** |
| M1_WP2_UHF | M1RI + WP_P2_ME_z | Adds trustee mean wavelet power (WP2) | 27.79 | | | 2 | < .001 | 392.62 | 412.50 | *** |
| M1_WP1_WP2_UHF | M1RI + WP_P2_ME_z + WP_P1_ME_z | Adds both WP1 and WP2 | 27.62 | | | 1 | < .001 | 367.00 | 390.19 | *** |
| M1_IG2_1_UHF | M1_WP1_WP2 + P1_IG2_I_z + P2_IG2_E_z | Adds trustor investment & trustee back-transfer (IG round 1) | 5.29 | | | 2 | .071 | 365.72 | 395.53 |  |
| M1_IG2_2_UHF | M1_WP1_WP2 + P2_IG2_I_z + P1_IG2_E_z | Adds trustor investment & trustee back-transfer (IG round 2) | 3.15 | | | 2 | .212 | 367.85 | 397.67 |  |

Note. AIC = Akaike Information Criterion; BIC = Bayesian Information Criterion. Lower AIC/BIC values indicate better model fit. Likelihood-ratio tests compare each model to with the best-fit model before each iteration. ***p < .001, **p < .01, *p < .05.

**Table S4.** Model comparison results for Hypothesis 1 (predicting LHF-HRV synchrony during the investment game).

| Model Name | Model Equation | Model Description | χ² | df | p | AIC | BIC |  |
| --- | --- | --- | --- | --- | --- | --- | --- | --- |
| M1_LHF | Fixed-intercept model | Model with fixed intercept only |  |  |  | 632.95 | 639.57 |  |
| M1RI_LHF | M1 + (1|ID_Dyad_P1P2) | Null model with random intercept for dyads |  |  |  | 587.77 | 597.71 |  |
| M1_age_upper_LHF | M1RI + age_upper | Adds older participant age | 1.03 | 1 | .311 | 588.74 | 601.99 |  |
| M1_age_lower_LHF | M1RI + age_lower | Adds younger participant age | 3.42 | 1 | .064 | 586.34 | 599.60 |  |
| M1_BMI_upper_LHF | M1RI + BMI_upper | Adds upper BMI | 0.62 | 1 | .432 | 589.15 | 602.40 |  |
| M1_BMI_lower_LHF | M1RI + BMI_lower | Adds lower BMI | 0.56 | 1 | .456 | 589.21 | 602.46 |  |
| M1_knowing_LHF | M1RI + knowing | Adds familiarity of participants | 0.54 | 1 | .462 | 589.23 | 602.48 |  |
| M1_sex_LHF | M1RI + WP_P2_ME_z + WP_P1_ME_z + dyad_sex | Adds dyad sex composition | 6.71 | 2 | .035 | 585.06 | 601.62 | * |
| M1_WP1_LHF | M1_sex_LHF + WP_P1_ME_z | Adds trustor mean wavelet power (WP1) | 7.66 | 1 | .006 | 579.40 | 599.28 | ** |
| M1_WP2_LHF | M1_sex_LHF + WP_P2_ME_z | Adds trustee mean wavelet power (WP2) | 11.11 | 1 | < .001 | 578.56 | 595.83 | *** |
| M1_WP1_WP2_LHF | M1_sex_LHF + WP_P2_ME_z + WP_P1_ME_z | Adds both WP1 and WP2 | 14.35 | 1 | < .001 | 563.60 | 586.80 | *** |
| M1_IG2_1_LHF | M1_WP1_WP2 + P1_IG2_I_z + P2_IG2_E_z | Adds trustor investment & trustee back-transfer (IG round 1) | 2.38 | 2 | .304 | 565.22 | 595.04 |  |
| M1_IG2_2_LHF | M1_WP1_WP2 + P2_IG2_I_z + P1_IG2_E_z | Adds trustor investment & trustee back-transfer (IG round 1) | 5.051 | 2 | .080 | 562.55 | 592.37 |  |

Note. AIC = Akaike Information Criterion; BIC = Bayesian Information Criterion. Lower AIC/BIC values indicate better model fit. Likelihood-ratio tests compare each model to with the best-fit model before each iteration. ***p < .001, **p < .01, *p < .05.

**Table S5.** Model comparison results for Hypothesis 1 (predicting ULF-HRV synchrony during the investment game).

| Model Name | Model Equation | Model Description | χ² | df | p | AIC | BIC |  |
| --- | --- | --- | --- | --- | --- | --- | --- | --- |
| M1_ULF | Fixed-intercept model | Model with fixed intercept only |  |  |  | 617.58 | 624.20 |  |
| M1RI_ULF | M1 + (1|ID_Dyad_P1P2) | Null model with random intercept for dyads |  |  |  | 590.51 | 600.45 |  |
| M1_age_upper_ULF | M1RI + age_upper | Adds older participant age | 0.45 | 1 | .503 | 592.06 | 605.31 |  |
| M1_age_lower_ULF | M1RI + age_lower | Adds younger participant age | 1.30 | 1 | .254 | 591.22 | 604.46 |  |
| M1_BMI_upper_ULF | M1RI + BMI_upper | Adds upper BMI | 2.90 | 1 | .089 | 589.61 | 602.86 |  |
| M1_BMI_lower_ULF | M1RI + BMI_lower | Adds lower BMI | 0.05 | 1 | .820 | 592.45 | 605.71 |  |
| M1_knowing_ULF | M1RI + knowing | Adds familiarity of participants | 0.61 | 1 | .434 | 591.89 | 605.15 |  |
| M1_sex_ULF | M1RI + WP_P1_z + WP_P2_z + dyad_sex | Adds dyad sex composition | 2.55 | 2 | .279 | 591.96 | 608.52 |  |
| M1_WP1_ULF | M1RI + WP_P1 _z | Adds trustor mean wavelet power (WP1) | 3.74 | 1 | .053 | 588.77 | 602.02 |  |
| M1_WP2_ULF | M1RI + WP_P2 _z | Adds trustee mean wavelet power (WP2) | 18.07 | 1 | < .001 | 574.44 | 587.69 | *** |
| M1_WP1_WP2_ULF | M1RI + WP_P1_z + WP_P2_z | Adds both WP1 and WP2 | 7.77 | 1 | .005 | 568.67 | 585.23 | ** |
| M1_IG2_1_ULF | M1_WP1_WP2 + P1_IG2_I_z + P2_IG2_E_z | Adds trustor investment & trustee back-transfer (IG round 1) | 7.81 | 2 | .020 | 564.85 | 588.05 | * |
| M1_IG2_2_ULF | M1_WP1_WP2 + P2_IG2_I_z + P1_IG2_E_z | Adds trustor investment & trustee back-transfer (IG round 2) | 2.19 | 2 | .334 | 570.47 | 593.67 |  |

Note. AIC = Akaike Information Criterion; BIC = Bayesian Information Criterion. Lower AIC/BIC values indicate better model fit. Likelihood-ratio tests compare each model to with the best-fit model before each iteration. ***p < .001, **p < .01, *p < .05.

**Table S6**. Model comparison results for Hypothesis 1 (predicting LLF-HRV synchrony during the investment game).

| Model Name | Model Equation | Model Description | χ² | df | p | AIC | BIC |  |
| --- | --- | --- | --- | --- | --- | --- | --- | --- |
| M1_LLF | Fixed-intercept model | Model with fixed intercept only |  |  |  | 608.63 | 615.25 |  |
| M1RI_LLF | M1 + (1|ID_Dyad_P1P2) | Null model with random intercept for dyads |  |  |  | 597.96 | 607.90 |  |
| M1_age_upper_LLF | M1RI + age_upper | Adds older participant's age | 0.04 | 1 | .838 | 599.92 | 613.17 |  |
| M1_age_lower_LLF | M1RI + age_lower | Adds younger participant's age | 1.54 | 1 | .215 | 598.42 | 611.68 |  |
| M1_BMI_upper_LLF | M1RI + BMI_upper | Adds older participant's BMI | 2.49 | 1 | .115 | 597.48 | 610.72 |  |
| M1_BMI_lower_LLF | M1RI + BMI_lower | Adds younger participant's BMI | 1.36 | 1 | .243 | 598.60 | 611.85 |  |
| M1_knowing_LLF | M1RI + knowing | Adds familiarity of participants | 1.92 | 1 | .166 | 598.04 | 611.29 |  |
| M1_sex_LLF | M1RI + WP_P2_ME_z + WP_P1_ME_z + dyad_sex | Adds dyad sex | 1.86 | 2 | .395 | 600.10 | 616.67 |  |
| M1_WP1_LLF | M1RI + WP_P1_ME_z | Adds trustor mean wavelet power (WP1) | 0.53 | 1 | 0.465 | 599.43 | 612.68 |  |
| M1_WP2_LLF | M1RI + WP_P2_ME_z | Adds trustee mean wavelet power (WP2) | 17.36 | 1 | < .001 | 582.60 | 595.85 | *** |
| M1_WP1_WP2_LLF | M1RI + WP_P2_ME_z + WP_P1_ME_z | Adds both WP1 and WP2 | 0.41 | 1 | .520 | 584.19 | 600.75 |  |
| M1_IG2_1_LLF | M1_WP2_LLF + P1_IG2_I_z + P2_IG2_E_z | Adds trustor investment & trustee back-transfer (IG round 1) | 7.32 | 2 | .026 | 579.28 | 599.16 | ** |
| M1_IG2_2_LLF | M1_WP2_LLF + P2_IG2_I_z + P1_IG2_E_z | Adds trustor investment & trustee back-transfer (IG round 2) | 2.02 | 2 | .365 | 584.58 | 604.46 |  |

Note. AIC = Akaike Information Criterion; BIC = Bayesian Information Criterion. Lower AIC/BIC values indicate better model fit. Likelihood-ratio tests compare each model to with the best-fit model before each iteration. ***p < .001, **p < .01, *p < .05.

**Table S7.** Linear regression models for Hypothesis 2 (predicting trust decisions from UHF-HRV synchrony during the shared baseline).

| Model Name | Model Equation | Model Description | | F | df1 | df2 | p | AIC | BIC |  |
| --- | --- | --- | --- | --- | --- | --- | --- | --- | --- | --- |
| M2A_P1_IG2_I_UHF | P1_IG2_I_z ~ XWP_P1P2_z_mean | Synchrony predicting P1 investment |  | |  |  |  | 437.65 | 443.39 |  |
| M2_WP1_UHF | P1_IG2_I_z ~ XWP_P1P2_z_mean + WP_P1_z | Adds P1 wavelet power | 0.68 | | 1 | 47 | .414 | 438.93 | 446.58 |  |
| M2A_WP2_UHF | P1_IG2_I_z ~ XWP_P1P2_z_mean + WP_P2_z | Adds P2 wavelet power | 0.00 | | 1 | 47 | .984 | 439.65 | 447.30 |  |
| M2A_age_upper_UHF | P1_IG2_I_z ~ XWP_P1P2_z_mean + age_upper | Adds older participant age | 0.67 | | 1 | 47 | .419 | 438.95 | 446.60 |  |
| M2A_age_lower_UHF | P1_IG2_I_z ~ XWP_P1P2_z_mean + age_lower | Adds younger participant age | 0.04 | | 1 | 47 | .835 | 439.61 | 447.25 |  |
| M2A_BMI_upper_UHF | P1_IG2_I_z ~ XWP_P1P2_z_mean + BMI_upper | Adds upper BMI | 0.17 | | 1 | 47 | .681 | 439.47 | 447.12 |  |
| M2A_BMI_lower_UHF | P1_IG2_I_z ~ XWP_P1P2_z_mean + BMI_lower | Adds lower BMI | 0.27 | | 1 | 47 | .609 | 439.37 | 447.02 |  |
| M2A_knowing_UHF | P1_IG2_I_z ~ XWP_P1P2_z_mean + knowing | Adds familiarity of participants | 0.18 | | 1 | 47 | .675 | 439.46 | 447.11 |  |
| M2A_dyad_sex_UHF | P1_IG2_I_z ~ XWP_P1P2_z_mean + dyad_sex | Adds dyad sex | 1.63 | | 2 | 46 | .207 | 438.23 | 447.79 |  |
| M2B_P2_IG2_E_UHF | P2_IG2_E_z ~ XWP_P1P2_z_mean | Synchrony predicting P2 back-transfer | |  |  |  |  | 464.01 | 469.75 |  |
| M2B_WP1_UHF | P2_IG2_E_z ~ XWP_P1P2_z_mean + WP_P1_z | Adds P1 wavelet power | | 1.00 | 1 | 47 | .321 | 464.95 | 472.60 |  |
| M2B_WP2_UHF | P2_IG2_E_z ~ XWP_P1P2_z_mean + WP_P2_z | Adds P2 wavelet power | | 2.16 | 1 | 47 | .148 | 463.76 | 471.41 |  |
| M2B_age_upper_UHF | P2_IG2_E_z ~ XWP_P1P2_z_mean + age_upper | Adds older participant age | | 0.93 | 1 | 47 | .341 | 465.03 | 472.68 |  |
| M2B_age_lower_UHF | P2_IG2_E_z ~ XWP_P1P2_z_mean + age_lower | Adds younger participant age | | 0.23 | 1 | 47 | .637 | 465.77 | 473.42 |  |
| M2B_BMI_upper_UHF | P2_IG2_E_z ~ XWP_P1P2_z_mean + BMI_upper | Adds upper BMI | | 0.63 | 1 | 47 | .431 | 465.34 | 472.99 |  |
| M2B_BMI_lower_UHF | P2_IG2_E_z ~ XWP_P1P2_z_mean + BMI_lower | Adds lower BMI | | 2.22 | 1 | 47 | .143 | 463.70 | 471.35 |  |
| M2B_knowing_UHF | P2_IG2_E_z ~ XWP_P1P2_z_mean + knowing | Adds familiarity | | 12.13 | 1 | 47 | .001 | 454.53 | 462.18 | ** |
| M2B_dyad_sex_UHF | P2_IG2_E_z ~ XWP_P1P2_z_mean + dyad_sex | Adds dyad sex | | 0.25 | 2 | 46 | .776 | 467.46 | 477.02 |  |

Note. F tests compare each extended model to the corresponding baseline model (synchrony-only model) within the same outcome. df1/df2

are numerator and denominator degrees of freedom. AIC and BIC are reported for each model. p values are two-

tailed. p <.05*, p <.01**, p <.001***.

**Table S8.** Linear regression models for Hypothesis 2 (predicting trust decisions from LHF-HRV synchrony during the mere co-presence baseline task).

| Model Name | | Model Equation | | | Model Description | F | df1 | | | df2 | | p | AIC | BIC |  | |
| --- | --- | --- | --- | --- | --- | --- | --- | --- | --- | --- | --- | --- | --- | --- | --- | --- |
| M2A_P1_IG2_I_LHF | | P1_IG2_I_z ~ XWP_P1P2_z_mean | | | Synchrony predicting P1 investment |  |  | | |  | |  | 433.19 | 438.93 |  | |
| M2_WP1_LHF | | P1_IG2_I_z ~ XWP_P1P2_z_mean + WP_P1_z | | | Adds P1 wavelet power | 0.00 | 1 | | | 47 | | .964 | 435.19 | 442.84 |  | |
| M2A_WP2_LHF | | P1_IG2_I_z ~ XWP_P1P2_z_mean + WP_P2_z | | | Adds P2 wavelet power | 0.05 | 1 | | | 47 | | .828 | 435.14 | 442.79 |  | |
| M2A_age_upper_LHF | | P1_IG2_I_z ~ XWP_P1P2_z_mean + age_upper | | | Adds older participant age | 0.38 | 1 | | | 47 | | .541 | 434.79 | 442.44 |  | |
| M2A_age_lower_LHF | | P1_IG2_I_z ~ XWP_P1P2_z_mean + age_lower | | | Adds younger participant age | 0.48 | 1 | | | 47 | | .491 | 434.68 | 442.33 |  | |
| M2A_BMI_upper_LHF | | P1_IG2_I_z ~ XWP_P1P2_z_mean + BMI_upper | | | Adds upper BMI | 0.08 | 1 | | | 47 | | .772 | 435.10 | 442.75 |  | |
| M2A_BMI_lower_LHF | | P1_IG2_I_z ~ XWP_P1P2_z_mean + BMI_lower | | | Adds lower BMI | 0.38 | 1 | | | 47 | | .542 | 434.79 | 442.44 |  | |
| M2A_knowing_LHF | | P1_IG2_I_z ~ XWP_P1P2_z_mean + knowing | | | Adds familiarity of participants | 0.53 | 1 | | | 47 | | .470 | 434.63 | 442.28 |  | |
| M2A_dyad_sex_LHF | | P1_IG2_I_z ~ XWP_P1P2_z_mean + dyad_sex | | | Adds dyad sex | 0.69 | 2 | | | 46 | | .508 | 435.72 | 445.28 |  | |
| M2B_P2_IG2_E_LHF | | | P2_IG2_E_z ~ XWP_P1P2_z_mean | | Synchrony predicting P2 back-transfer |  | |  |  | |  | | 463.84 | 469.58 | |  | |
| M2B_WP1_LHF | P2_IG2_E_z ~ XWP_P1P2_z_mean + WP_P1_z | | | Adds P1 wavelet power | | 0.09 | | 1 | 47 | | .772 | | 465.75 | 473.40 | |  | |
| M2B_WP2_LHF | P2_IG2_E_z ~ XWP_P1P2_z_mean + WP_P2_z | | | Adds P2 wavelet power | | 0.10 | | 1 | 47 | | .756 | | 465.74 | 473.39 | |  | |
| M2B_age_upper_LHF | P2_IG2_E_z ~ XWP_P1P2_z_mean + age_upper | | | Adds older participant age | | 0.85 | | 1 | 47 | | .360 | | 464.94 | 472.59 | |  | |
| M2B_age_lower_LHF | P2_IG2_E_z ~ XWP_P1P2_z_mean + age_lower | | | Adds younger participant age | | 0.16 | | 1 | 47 | | .693 | | 465.68 | 473.32 | |  | |
| M2B_BMI_upper_LHF | P2_IG2_E_z ~ XWP_P1P2_z_mean + BMI_upper | | | Adds upper BMI | | 0.59 | | 1 | 47 | | .445 | | 465.22 | 472.86 | |  | |
| M2B_BMI_lower_LHF | P2_IG2_E_z ~ XWP_P1P2_z_mean + BMI_lower | | | Adds lower BMI | | 2.17 | | 1 | 47 | | .148 | | 463.59 | 471.24 | |  | |
| M2B_knowing_LHF | P2_IG2_E_z ~ XWP_P1P2_z_mean + knowing | | | Adds familiarity | | 11.89 | | 1 | 47 | | .001 | | 454.56 | 462.21 | | ** | |
| M2B_dyad_sex_LHF | P2_IG2_E_z ~ XWP_P1P2_z_mean + dyad_gender | | | Adds dyad sex | | 0.32 | | 2 | 46 | | .724 | | 467.14 | 476.70 | |  | |

Note. Estimates are from cumulative link mixed models predicting ordered trust decisions. HRV synchrony = z-transformed cross-wavelet power (CWP). AIC = Akaike Information Criterion; logLik = model log-likelihood. Lower AIC values indicate better model fit.
***p < .001, **p < .01, *p < .05.

**Table S9.** Linear regression models for Hypothesis 2 (predicting trust decisions from ULF-HRV synchrony during the mere co-presence baseline task).

| Model Name | Model Equation | Model Description | F | df1 | df2 | p | AIC | BIC |  |
| --- | --- | --- | --- | --- | --- | --- | --- | --- | --- |
| M2A_P1_IG2_I_ULF | P1_IG2_I_z ~ XWP_P1P2_z_mean | Synchrony predicting P1 investment |  |  |  |  | 440.91 | 446.65 |  |
| M2_WP1_ULF | P1_IG2_I_z ~ XWP_P1P2_z_mean + WP_P1_z | Adds P1 wavelet power | 0.27 | 1 | 47 | .605 | 442.63 | 450.27 |  |
| M2A_WP2_ULF | P1_IG2_I_z ~ XWP_P1P2_z_mean + WP_P2_z | Adds P2 wavelet power | 0.09 | 1 | 47 | .765 | 442.82 | 450.47 |  |
| M2A_age_upper_ULF | P1_IG2_I_z ~ XWP_P1P2_z_mean + age_upper | Adds older participant age | 0.89 | 1 | 47 | .350 | 441.98 | 449.62 |  |
| M2A_age_lower_ULF | P1_IG2_I_z ~ XWP_P1P2_z_mean + age_lower | Adds younger participant age | 0.00 | 1 | 47 | .986 | 442.91 | 450.56 |  |
| M2A_BMI_upper_ULF | P1_IG2_I_z ~ XWP_P1P2_z_mean + BMI_upper | Adds upper BMI | 0.37 | 1 | 47 | .548 | 442.53 | 450.18 |  |
| M2A_BMI_lower_ULF | P1_IG2_I_z ~ XWP_P1P2_z_mean + BMI_lower | Adds lower BMI | 0.02 | 1 | 47 | .896 | 442.90 | 450.54 |  |
| M2A_knowing_ULF | P1_IG2_I_z ~ XWP_P1P2_z_mean + knowing | Adds familiarity of participants | 0.08 | 1 | 47 | .783 | 442.83 | 450.48 |  |
| M2A_dyad_sex_ULF | P1_IG2_I_z ~ XWP_P1P2_z_mean + dyad_sex | Adds dyad sex | 0.74 | 2 | 46 | .483 | 443.33 | 452.89 |  |
| M2B_P2_IG2_E_ULF | P2_IG2_E_z ~ XWP_P1P2_z_mean | Synchrony predicting P2 back-transfer |  |  |  |  | 463.95 | 469.68 |  |
| M2B_WP1_ULF | P2_IG2_E_z ~ XWP_P1P2_z_mean + WP_P1_z | Adds P1 wavelet power | 0.05 | 1 | 47 | .829 | 465.90 | 473.54 |  |
| M2B_WP2_ULF | P2_IG2_E_z ~ XWP_P1P2_z_mean + WP_P2_z | Adds P2 wavelet power | 0.83 | 1 | 47 | .367 | 465.07 | 472.72 |  |
| M2B_age_upper_ULF | P2_IG2_E_z ~ XWP_P1P2_z_mean + age_upper | Adds older participant age | 0.86 | 1 | 47 | .358 | 465.04 | 472.69 |  |
| M2B_age_lower_ULF | P2_IG2_E_z ~ XWP_P1P2_z_mean + age_lower | Adds younger participant age | 0.19 | 1 | 47 | .664 | 465.74 | 473.39 |  |
| M2B_BMI_upper_ULF | P2_IG2_E_z ~ XWP_P1P2_z_mean + BMI_upper | Adds upper BMI | 0.72 | 1 | 47 | .399 | 465.18 | 472.83 |  |
| M2B_BMI_lower_ULF | P2_IG2_E_z ~ XWP_P1P2_z_mean + BMI_lower | Adds lower BMI | 2.48 | 1 | 47 | .122 | 463.37 | 471.01 |  |
| M2B_knowing_ULF | P2_IG2_E_z ~ XWP_P1P2_z_mean + knowing | Adds familiarity | 12.43 | 1 | 47 | < .001 | 454.21 | 461.86 | *** |
| M2B_dyad_sex_ULF | P2_IG2_E_z ~ XWP_P1P2_z_mean + dyad_gender | Adds dyad sex | 0.31 | 2 | 46 | .736 | 467.28 | 476.84 |  |

Note. F tests compare each extended model to the corresponding baseline model (synchrony-only model) within the same outcome. df1/df2 are numerator and denominator degrees of freedom. AIC and BIC are reported for each model. p values are two-tailed. p <.05*, p <.01**, p <.001***.

**Table S10**. Linear regression models for Hypothesis 2 (predicting trust decisions from LLF-HRV synchrony during the mere co-presence baseline task).

| Model Name | Model Equation | Model Description | F | df1 | df2 | p | AIC | BIC |  |
| --- | --- | --- | --- | --- | --- | --- | --- | --- | --- |
| M2A_P1_IG2_I_LLF | P1_IG2_I_z ~ XWP_P1P2_z_mean | Synchrony predicting P1 investment |  |  |  |  | 439.51 | 445.25 |  |
| M2_WP1_LLF | P1_IG2_I_z ~ XWP_P1P2_z_mean + WP_P1_z | Adds P1 wavelet power | 1.58 | 1 | 47 | .215 | 439.86 | 447.51 |  |
| M2A_WP2_LLF | P1_IG2_I_z ~ XWP_P1P2_z_mean + WP_P2_z | Adds P2 wavelet power | 0.00 | 1 | 47 | .974 | 441.51 | 449.16 |  |
| M2A_age_upper_LLF | P1_IG2_I_z ~ XWP_P1P2_z_mean + age_upper | Adds older participant age | 1.54 | 1 | 47 | .221 | 439.91 | 447.55 |  |
| M2A_age_lower_LLF | P1_IG2_I_z ~ XWP_P1P2_z_mean + age_lower | Adds younger participant age | 0.01 | 1 | 47 | .929 | 441.51 | 449.15 |  |
| M2A_BMI_upper_LLF | P1_IG2_I_z ~ XWP_P1P2_z_mean + BMI_upper | Adds upper BMI | 0.22 | 1 | 47 | .639 | 441.28 | 448.93 |  |
| M2A_BMI_lower_LLF | P1_IG2_I_z ~ XWP_P1P2_z_mean + BMI_lower | Adds lower BMI | 0.05 | 1 | 47 | .830 | 441.47 | 449.11 |  |
| M2A_knowing_LLF | P1_IG2_I_z ~ XWP_P1P2_z_mean + knowing | Adds familiarity of participants | 0.02 | 1 | 47 | .898 | 441.50 | 449.14 |  |
| M2A_dyad_sex_LLF | P1_IG2_I_z ~ XWP_P1P2_z_mean + dyad_sex | Adds dyad sex | 0.85 | 2 | 46 | .432 | 441.69 | 451.25 |  |
| M2B_P2_IG2_E_LLF | P2_IG2_E_z ~ XWP_P1P2_z_mean | Synchrony predicting P2 back-transfer |  |  |  |  | 463.62 | 469.34 |  |
| M2B_WP1_LLF | P2_IG2_E_z ~ XWP_P1P2_z_mean + WP_P1_z | Adds P1 wavelet power | 0.96 | 1 | 47 | .331 | 464.61 | 472.26 |  |
| M2B_WP2_LLF | P2_IG2_E_z ~ XWP_P1P2_z_mean + WP_P2_z | Adds P2 wavelet power | 0.14 | 1 | 47 | .707 | 465.47 | 473.13 |  |
| M2B_age_upper_LLF | P2_IG2_E_z ~ XWP_P1P2_z_mean + age_upper | Adds older participant age | 0.82 | 1 | 47 | .369 | 464.76 | 472.40 |  |
| M2B_age_lower_LLF | P2_IG2_E_z ~ XWP_P1P2_z_mean + age_lower | Adds younger participant age | 0.28 | 1 | 47 | .599 | 465.32 | 472.97 |  |
| M2B_BMI_upper_LLF | P2_IG2_E_z ~ XWP_P1P2_z_mean + BMI_upper | Adds upper BMI | 0.85 | 1 | 47 | .360 | 464.72 | 472.37 |  |
| M2B_BMI_lower_LLF | P2_IG2_E_z ~ XWP_P1P2_z_mean + BMI_lower | Adds lower BMI | 2.54 | 1 | 47 | .118 | 462.99 | 470.63 |  |
| M2B_knowing_LLF | P2_IG2_E_z ~ XWP_P1P2_z_mean + knowing | Adds familiarity | 11.79 | 1 | 47 | .001 | 454.43 | 462.08 | ** |
| M2B_dyad_sex_LLF | P2_IG2_E_z ~ XWP_P1P2_z_mean + dyad_sex | Adds dyad sex | 0.25 | 2 | 46 | .781 | 467.08 | 476.64 |  |

Note. AIC = Akaike Information Criterion; BIC = Bayesian Information Criterion. Lower AIC/BIC values indicate better model fit. Likelihood-ratio tests compare each model to with the best-fit model before each iteration. ***p < .001, **p < .01, *p < .05.

**Table S11**. Model comparison results for Hypothesis 3 (trust decisions predicting subsequent UHF-HRV synchrony after the investment game).

| Model Name | Model Equation | Model Description | χ² | df | p | AIC | BIC |  |
| --- | --- | --- | --- | --- | --- | --- | --- | --- |
| M3_UHF | Fixed-intercept model | Model with fixed intercept only |  |  |  | 1,308.85 | 1,317.27 |  |
| M3RI_UHF | M3 + (1|ID_Dyad_P1P2) | Null model with random intercept for dyads |  |  |  | 1,114.15 | 1,126.78 |  |
| M3_SE_UHF | M3RI + sub_e | Adds subevent fixed effects | 5.66 | 4 | .226 | 1,116.48 | 1,145.96 |  |
| M3_age_upper_UHF | M3RI + age_upper | Adds older participant age | 1.14 | 1 | .286 | 1,115.01 | 1,131.85 |  |
| M3_age_lower_UHF | M3RI + age_lower | Adds younger participant age | 4.26 | 1 | .039 | 1,111.88 | 1,128.72 | * |
| M3_BMI_upper_UHF | M3RI + BMI_upper | Adds upper BMI | 0.14 | 1 | .712 | 1,116.01 | 1,132.85 |  |
| M3_BMI_lower_UHF | M3RI + BMI_lower | Adds lower BMI | 1.58 | 1 | .209 | 1,114.57 | 1,131.41 |  |
| M3_knowing_UHF | M3RI + knowing | Adds familiarity of participants | 0.54 | 1 | .464 | 1,115.61 | 1,132.45 |  |
| M3_sex_UHF | M3RI + WP_P2_ME_z + WP_P1_ME_z + dyad_sex | Adds dyad sex composition | 4.36 | 2 | .113 | 1,113.79 | 1134.84 |  |
| M3_WP1_UHF | M3_age_lower_UHF + WP_P1_ME_z | Adds trustor mean wavelet power (WP1) | 19.27 |  | < .001 | 1,094.62 | 1,115.67 | *** |
| M3_WP2_UHF | M3_age_lower_UHF + WP_P2_ME_z | Adds trustee mean wavelet power (WP2) | 28.75 | 1 | < .001 | 1,085.13 | 1,106.19 | *** |
| M3_WP1_WP2_UHF | M3_age_lower_UHF + WP_P2_ME_z + WP_P1_ME_z | Adds both WP1 and WP2 | 29.96 | 1 | < .001 | 1,057.18 | 1,082.44 | *** |
| M3_IG2_1_UHF | M3_WP1_WP2 + P1_IG2_I_z + P2_IG2_E_z | Adds trustor investment & trustee back-transfer (IG round 1) | 4.00 | 2 | .135 | 1,057.17 | 1,090.86 |  |
| M3_IG2_2_UHF | M3_WP1_WP2 + P2_IG2_I_z + P1_IG2_E_z | Adds trustor investment & trustee back-transfer (IG round 1) | 1.53 | 2 | .466 | 1,059.65 | 1,093.34 |  |

Note. AIC = Akaike Information Criterion; BIC = Bayesian Information Criterion. Lower AIC/BIC values indicate better model fit. Likelihood-ratio tests compare each model to with the best-fit model before each iteration. ***p < .001, **p < .01, *p < .05.

**Table S12**. Model comparison results for Hypothesis 3 (trust decisions predicting subsequent LHF-HRV synchrony after the investment game).

| Model Name | Model Equation | Model Description | χ² | df | p | AIC | BIC |  |
| --- | --- | --- | --- | --- | --- | --- | --- | --- |
| M3_LHF | Fixed-intercept model | Model with fixed intercept only |  |  |  | 1,334.85 | 1,343.28 |  |
| M3RI_LHF | M3 + (1|ID_Dyad_P1P2) | Null model with random intercept for dyads |  |  |  | 1,258.83 | 1,271.46 |  |
| M3_SE_LHF | M3RI + sub_e | Adds subevent fixed effects | 2.34 | 4 | .674 | 1,264.50 | 1,293.97 |  |
| M3_age_upper_LHF | M3RI + age_upper | Adds older participant's age | 1.18 | 1 | .276 | 1,259.65 | 1,276.49 |  |
| M3_age_lower_LHF | M3RI + age_lower | Adds younger participant's age | 9.40 | 1 | .002 | 1,251.44 | 1,268.28 | ** |
| M3_BMI_upper_LHF | M3RI + BMI_upper | Adds older participant's BMI | 0.03 | 1 | .855 | 1,260.80 | 1,277.64 |  |
| M3_BMI_lower_LHF | M3RI + BMI_lower | Adds younger participant's BMI | 0.97 | 1 | .324 | 1,259.86 | 1,276.70 |  |
| M3_knowing_LHF | M3RI + knowing | Adds familiarity of participants | 1.21 | 1 | .271 | 1,259.62 | 1276.46 |  |
| M3_sex_LHF | M3RI + WP_P2_ME_z + WP_P1_ME_z + dyad_sex | Adds dyad sex | 2.56 | 2 | .278 | 1,260.27 | 1,281.32 |  |
| M3_WP1_LHF | M3_age_lower_LHF + WP_P1_ME_z | Adds trustor mean wavelet power (WP1) | 7.53 | 1 | .006 | 1,245.90 | 1,266.96 | ** |
| M3_WP2_LHF | M3_age_lower_LHF + WP_P2_ME_z | Adds trustee mean wavelet power (WP2) | 10.93 | 1 | < .001 | 1,242.51 | 1,263.56 | *** |
| M3_WP1_WP2 | M3_age_lower_LHF + WP_P2_ME_z + WP_P1_ME_z | Adds both WP1 and WP2 | 16.12 | 1 | < .001 | 1,228.39 | 1,253.65 | *** |
| M3_IG2_1_LHF | M3_WP1_WP2 + P1_IG2_I_z + P2_IG2_E_z | Adds trustor investment & trustee back-transfer (IG round 1) | 2.55 | 2 | .279 | 1,229.84 | 1,263.52 |  |
| M3_IG2_2_LHF | M3_WP1_WP2 + P2_IG2_I_z + P1_IG2_E_z | Adds trustor investment & trustee back-transfer (IG round 2) | 1.58 | 2 | .453 | 1,230.80 | 1,264.49 |  |

Note. AIC = Akaike Information Criterion; BIC = Bayesian Information Criterion. Lower AIC/BIC values indicate better model fit. Likelihood-ratio tests compare each model to with the best-fit model before each iteration. ***p < .001, **p < .01, *p < .05.

**Table S13**. Model comparison results for Hypothesis 3 (trust decisions predicting subsequent ULF-HRV synchrony after the investment game).

| Model Name | Model Equation | Model Description | χ² | df | p | AIC | BIC |  |
| --- | --- | --- | --- | --- | --- | --- | --- | --- |
| M3_ULF | Fixed-intercept model | Model with fixed intercept only |  |  |  | 1,415.92 | 1,424.35 |  |
| M3RI_ULF | M3 + (1|ID_Dyad_P1P2) | Null model with random intercept for dyads |  |  |  | 1,352.59 | 1,365.22 |  |
| M3_SE_ULF | M3RI + sub_e | Adds subevent fixed effects | 12.69 | 4 | .013 | 1,347.90 | 1,377.37 | * |
| M3_age_upper_ULF | M3_SE_ULF + age_upper | Adds older participant age | 1.73 | 1 | .187 | 1348.16 | 1381.84 |  |
| M3_age_lower_ULF | M3_SE_ULF + age_lower | Adds younger participant age | 3.45 | 1 | .063 | 1,346.45 | 1,380.13 |  |
| M3_BMI_upper_ULF | M3_SE_ULF + BMI_upper | Adds upper BMI | 0.26 | 1 | .609 | 1,349.64 | 1,383.32 |  |
| M3_BMI_lower_ULF | M3_SE_ULF + BMI_lower | Adds lower BMI | 0.01 | 1 | .919 | 1,349.89 | 1,383.57 |  |
| M3_knowing_ULF | M3_SE_ULF + knowing | Adds familiarity of participants | 1.21 | 1 | .271 | 1,349.81 | 1,383.49 |  |
| M3_sex_ULF | M3_SE_ULF + WP_P2_ME_z + WP_P1_ME_z + dyad_sex | Adds dyad sex | 0.20 | 2 | .903 | 1,351.69 | 1,389.59 |  |
| M3_WP1_ULF | M3_SE_ULF + WP_P1_ME_z | Adds trustor mean wavelet power (WP1) | 17.72 | 1 | < .001 | 1,332.18 | 1,365.87 | *** |
| M3_WP2_ULF | M3_SE_ULF + WP_P2_ME_z | Adds trustee mean wavelet power (WP2) | 2.32 | 1 | .128 | 1,347.58 | 1,381.26 | * |
| M3_WP1_WP2_ULF | M3_SE_ULF + WP_P2_ME_z + WP_P1_ME_z | Adds both WP1 and WP2 | 20.55 | 1 | < .001 | 1,329.03 | 1,366.92 | *** |
| M3_IG2_1_ULF | M3_WP1_WP2 + P1_IG2_I_z + P2_IG2_E_z | Adds trustor investment & trustee back-transfer (IG round 1) | 8.02 | 2 | 0.018 | 1,325.01 | 1,371.33 | * |
| M3_IG2_2_ULF | M3_WP1_WP2 + P2_IG2_I_z + P1_IG2_E_z | Adds trustor investment & trustee back-transfer (IG round 2) | 4.33 | 2 | 0.115 | 1,328.70 | 1,375.01 |  |

Note. AIC = Akaike Information Criterion; BIC = Bayesian Information Criterion. Lower AIC/BIC values indicate better model fit. Likelihood-ratio tests compare each model to with the best-fit model before each iteration. ***p < .001, **p < .01, *p < .05.

**Table S14**. Model comparison results for Hypothesis 3 (trust decisions predicting subsequent LLF-HRV synchrony after the investment game).

| Model Name | Model Equation | Model Description | χ² | df | p | AIC | BIC |  |
| --- | --- | --- | --- | --- | --- | --- | --- | --- |
| M3_LLF | Fixed-intercept model | Model with fixed intercept only |  |  |  | 1,469.33 | 1,477.76 |  |
| M3RI_LLF | M3 + (1|ID_Dyad_P1P2) | Null model with random intercept for dyads |  |  |  | 1,432.130 | 1,444.76 |  |
| M3_SE_LLF | M3RI + sub_e | Adds subevent fixed effects | 8.06 | 4 | .089 | 1,432.07 | 1,461.55 |  |
| M3_age_upper_LLF | M3RI + age_upper | Adds older participant's age | 1.41 | 1 | .235 | 1,432.72 | 1,449.56 |  |
| M3_age_lower_LLF | M3RI + age_lower | Adds younger participant's age | 2.77 | 1 | .096 | 1,431.36 | 1,448.20 |  |
| M3_BMI_upper_LLF | M3RI + BMI_upper | Adds older participant's BMI | 0.05 | 1 | .817 | 1,434.08 | 1,450.92 |  |
| M3_BMI_lower_LLF | M3RI + BMI_lower | Adds younger participant's BMI | 0.22 | 1 | .638 | 1,433.91 | 1,450.75 |  |
| M3_knowing_LLF | M3RI + knowing | Adds familiarity of participants | 0.036 | 1 | .850 | 1,438.80 | 1,455.64 |  |
| M3_sex_LLF | M3_SE_ULF + WP_P2_ME_z + WP_P1_ME_z + dyad_sex | Adds dyad sex | 0.52 | 2 | .772 | 1435.61 | 1456.66 |  |
| M3_WP1_LLF | M3RI + WP_P1_ME_z | Adds trustor mean wavelet power (WP1) | 8.70 | 1 | .003 | 1425.43 | 1442.27 | ** |
| M3_WP2_LLF | M3RI + WP_P2_ME_z | Adds trustee mean wavelet power (WP2) | 4.77 | 1 | .029 | 1429.36 | 1446.21 | * |
| M3_WP1_WP2_LLF | M3RI + WP_P2_ME_z + WP_P1_ME_z | Adds both WP1 and WP2 | 8.63 | 1 | .003 | 1422.73 | 1443.78 | ** |
| M3_IG2_1_LLF | M3_WP1_WP2 + P1_IG2_I_z + P2_IG2_E_z | Adds trustor investment & trustee back-transfer (IG round 1) | 6.23 | 2 | .044 | 1420.50 | 1449.97 | * |
| M3_IG2_2_LLF | M3_WP1_WP2 + P2_IG2_I_z + P1_IG2_E_z | Adds trustor investment & trustee back-transfer (IG round 2) | 1.77 | 2 | .411 | 1424.95 | 1454.43 |  |

Note. AIC = Akaike Information Criterion; BIC = Bayesian Information Criterion. Lower AIC/BIC values indicate better model fit. Likelihood-ratio tests compare each model to with the best-fit model before each iteration. ***p < .001, **p < .01, *p < .05.
